# Supplementary material
Source: Springer Nature journal article supplement (https://www.springermedizin.de/resource/supplementary/13048_2010_58_MOESM6_ESM.pdf/9664802)

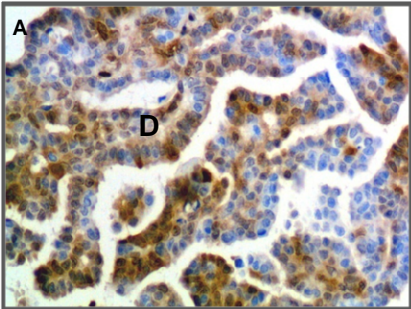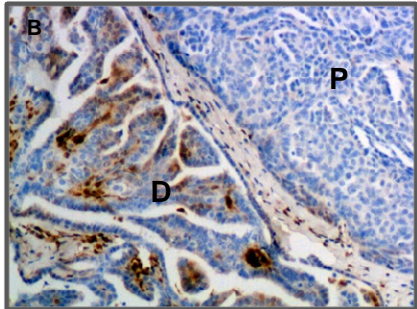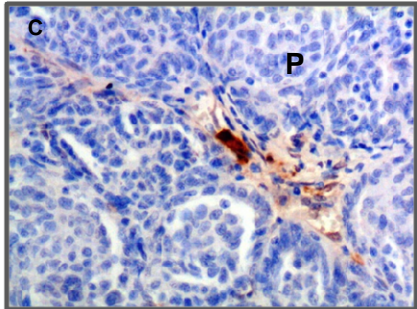

Supplement: MOESM6 [file 9664802]
